# Supplementary material for: Analysis of Human Clinical Mutations of Mitochondrial ND1 in a Bacterial Model System for Complex I
Source: MDPI journal article supplement (doi:10.3390/life12111934), 2022-11-20
Supplement: s1 [file s1]

Supplementary Table S1  
Primers used for Q5 mutagenesis

| Mutation <sup>1</sup> | Restriction Sites <sup>2</sup>       | Forward primer                           | Reverse primer                        |
|-----------------------|--------------------------------------|------------------------------------------|---------------------------------------|
| R37A                  | GGCGGCC<br>Asc I                     | GCTTTGGCGAGGCGCGCCTGCTGGG                | TCATGAATGCCCCGCAGG                    |
| R37Q                  | AGCGCT<br>Afe I                      | TTTGGCGAACAGCGCTTGCTGGGTCTG              | GCTCATGAATGCCCCGCA                    |
| L42A                  | GGCGCC<br>Kas I                      | GCCTGCTGCGCGCCTTCCAGAACCGTTAC            | GACGTTCGCCAAAGCTCA                    |
| L42S                  | CYCGRG<br>Ava I                      | TCGTTCCAGAACCGTTACGGACCTAAC              | CCCGAGCAGGCGACGTTGCGCA                |
| R46A                  | CGTACG<br>BsiW I                     | GTTCCAGAACGCGTACGGACCTAACCGT<br>GTTGGCTG | AGACCCAGCAGGCGACGT                    |
| R46H                  | CCA-N <sub>9</sub> -<br>TGG<br>Xcm I | TTCCAGAACATTATGGACCTAACCGTGT<br>TG       | CAGACCCAGCAGGCGACG                    |
| N50A                  | GCCGGC<br>NgoM I                     | ACCGTTACGGGCCGCGCCGTGTTGGC               | TCTGGAACAGACCCAGCA                    |
| N50D                  | CGATCG<br>Pvu I                      | CGTTACGGACCCGATCGTGTGTTGGCT              | GTTCTGGAACAGACCCAG                    |
| E71A                  | Eci I<br>GGCGGA                      | TGTTCTTTAAGCGGACTGGATCCCG                | TTTTGATCATGTCCGCAAC                   |
| E71K                  | Loss of Dra I<br>TTTAAA              | TGTTCTTTAAGAAGGACTGGATCCCG               | TTTTGATCATGTCCGCAAC                   |
| E228A                 | CTRYAG<br>Sfe I                      | TAGCGGTATGAAGTTCGGTCTG                   | TAGGCAATGTGGTAACCATCCG                |
| E228K                 | AGTACT<br>Sca I                      | TTACCACATTAGTACTCCGGTATGAAGT<br>TCGG     | CCATCCGCCAGTTCCTGC                    |
| L289A                 | CCGCGG<br>Sac II                     | GTATGACCAGGTAATGTCCTTCGGCTGGA<br>AA      | CGCGGACGCGGCGCCGACGCACGAATCA<br>AAATG |
| L289S                 | CCGCGG<br>Sac II                     | GTATGACCAGGTAATGTCCTTCGGCTGGA<br>AA      | CGCGGACGCGGCGACGACGCACGAATCA<br>AAATG |
| R291A                 | CCGCGG<br>Sac II                     | GTATGACCAGGTAATGTCCTTCGGCTGGA<br>AA      | CGCGGCGCCGGTAACGACGCACGAATCA<br>AAATG |
| R291Q                 | CCGCGG<br>Sac II                     | GTATGACCAGGTAATGTCCTTCGGCTGGA<br>AA      | CGCGGTTGCGGTAACGACGCACGAATCA<br>AAATG |
| V297P                 | CCGCGG<br>Sac II                     | GTATGACCAAGCCAATGTCCTTCGGCTGGA<br>AA     | CGCGGACGCGGTAACGACGCACGAATCA<br>AAATG |

<sup>1</sup> Codons for the mutated residues are colored red

<sup>2</sup> Restriction sites used for identification of mutations are colored blue (unless the nucleotides include the mutated residue)
